# Supplementary material for: Formation of highly elastomeric and property-tailorable poly(glycerol sebacate)-co-poly(ethylene glycol) hydrogels through thiol–norbornene photochemistry
Source: Royal Society of Chemistry journal article supplement (doi:10.1039/d0bm00632g), 2020-01-01
Supplement: d0bm00632g3.pdf [file d0bm00632g3.pdf]

## Supplementary information

### Formation of highly elastomeric and property-tailorable poly(glycerol sebacate)-co-poly(ethylene glycol) hydrogels through thiol-norbornene photochemistry

Yu-Ting Tsai,<sup>a</sup> Chun-Wei Chang<sup>a</sup> and Yi-Cheun Yeh<sup>\*a</sup>

<sup>a</sup>Institute of Polymer Science and Engineering, National Taiwan University, Taipei, Taiwan

E-mail: yicheun@ntu.edu.tw

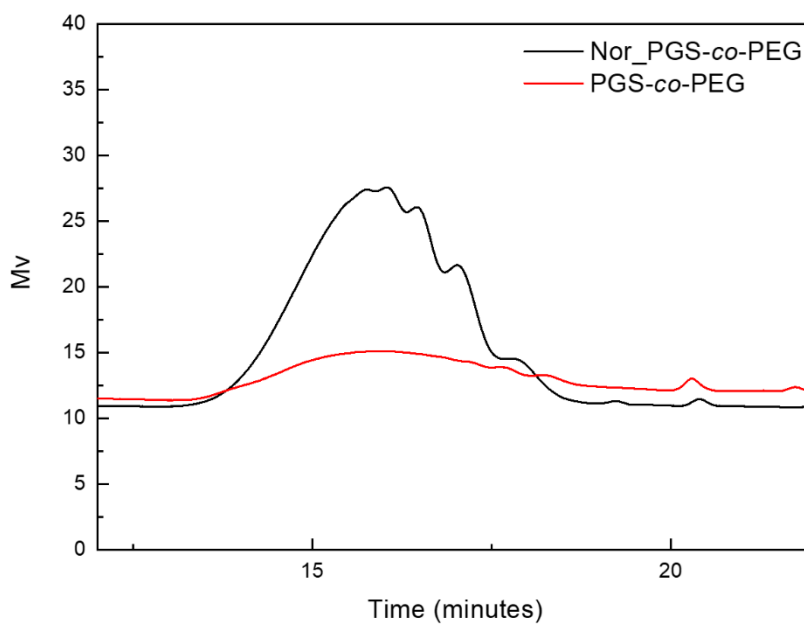

**Fig. S1** GPC traces of PGS-co-PEG and Nor\_PGS-co-PEG macromers. PGS-co-PEG:  $M_w = 8.8$  kDa, PDI = 6.87; Nor\_PGS-co-PEG:  $M_w = 9.6$  kDa, PDI = 2.71.
